# Supplementary material for: Facile access to functional polyacrylates with dual stimuli response and tunable surface hydrophobicity
Source: Royal Society of Chemistry journal article supplement (doi:10.1039/d1py00378j), 2021-01-01
Supplement: d1py00378j1.pdf [file d1py00378j1.pdf]

**Electronic Supplementary Information**

**Facile access to functional polyacrylates with dual stimuli  
response and tunable surface hydrophobicity**

Sk Arif Mohammad,<sup>a</sup> Subrata Dolui,<sup>a</sup> Devendra Kumar,<sup>a</sup> Shivshankar R. Mane<sup>b</sup> and Sanjib Banerjee\*<sup>a</sup>

<sup>a</sup>Department of Chemistry, Indian Institute of Technology Bhilai, Raipur 492015,  
Chhattisgarh, India

<sup>b</sup>Polymer Science and Engineering Division, CSIR-National Chemical Laboratory, Pune,  
Maharashtra 411008, India

\*Corresponding Author: E-mail: sanjib.banerjee@iitbhilai.ac.in (S. Banerjee)

**Table of contents :**

|                                                                                                                                                            |              |
|------------------------------------------------------------------------------------------------------------------------------------------------------------|--------------|
| <b>A. Supporting tables.....</b>                                                                                                                           | <b>S3</b>    |
| Table S1. Ni-Co mediated RDRP of MA using different ligands and initiators.....                                                                            | S3           |
| Table S2. Kinetics Study of Ni-Co mediated RDRP of MA .....                                                                                                | S3           |
| <b>B. Supporting scheme.. .....</b>                                                                                                                        | <b>S4</b>    |
| Scheme S1. Chemical structures of the initiators employed in this study .....                                                                              | S4           |
| <b>C. Supporting figures.....</b>                                                                                                                          | <b>S5-S8</b> |
| Fig. S1 ATR-IR spectra of PMA-Br, PMA- <i>b</i> -PDMAEMA, PMA- <i>b</i> -PTBMA and<br>PMA- <i>b</i> -POFPA .....                                           | S5           |
| Fig. S2 SEC traces of PMA-Br, PMA- <i>b</i> -PDMAEMA, PMA- <i>b</i> -PTBMA and PMA- <i>b</i> -<br>POFPA .....                                              | S6           |
| Fig. S3 Plot of the hydrodynamic diameter ( $D_h$ ) as a function of temperature for<br>aqueous solution of PMA- <i>b</i> -PDMAEMA diblock copolymer ..... | S7           |
| Fig. S3 <sup>1</sup> H NMR spectra of PMA-Br and PMA- <i>b</i> -PTBMA before and after hydrolysis<br>of the <i>tert</i> -butyl ester groups.....           | S8           |
| Fig. S4 <sup>1</sup> H NMR spectrum of PMA- <i>b</i> -PMAA .....                                                                                           | S9           |
| Fig. S5 <sup>13</sup> C NMR spectrum of PMA- <i>b</i> -PMAA .....                                                                                          | S10          |

## A. Supporting tables

**Table S1** Reaction conditions and results for the Ni-Co alloy mediated RDRP of MA in DMSO

| Entry | Reaction condition                 | Time (h) | Conv. <sup>b</sup> (%) | $M_{n,theo.}^c$ (g mol <sup>-1</sup> ) | $M_{n,SEC}^d$ (g mol <sup>-1</sup> ) | $\mathcal{D}^d$ |
|-------|------------------------------------|----------|------------------------|----------------------------------------|--------------------------------------|-----------------|
| P1    | MA/EBiB/Ni-Co/Me <sub>6</sub> TREN | 0.5      | 100                    | 17400                                  | 17100                                | 1.17            |
| P2    | MA/MBP/Ni-Co/Me <sub>6</sub> TREN  | 0.5      | 91                     | 16300                                  | 14300                                | 1.22            |
| P3    | MA/BEB/Ni-Co/ Me <sub>6</sub> TREN | 0.5      | 79                     | 14400                                  | 12900                                | 1.29            |
| P4    | MA/EBiB/Ni-Co/bpy                  | 0.5      | 41                     | 7250                                   | 6300                                 | 1.48            |
| P5    | MA/EBiB/Ni-Co/PMDETA               | 0.5      | 67                     | 11700                                  | 10400                                | 1.54            |
| P6    | MA/EBiB/Ni-Co                      | 24       | 0                      | -                                      | -                                    | -               |
| P7    | MA/EBiB/Me <sub>6</sub> TREN       | 24       | 0                      | -                                      | -                                    | -               |

at 25 °C.<sup>a</sup>

<sup>a</sup>Reaction Conditions:  $[MA]_0/[I]_0 = 200$ . <sup>b</sup>Determined gravimetrically based on monomer feed.

<sup>c</sup>Calculated using yield as conversion and the following equation:  $M_{n,theo} = ([MA]_0/[I]_0 \times \text{yield} \times M_{MA}) + M_I$ , where  $M_{MA}$  (= 86.09 g mol<sup>-1</sup>),  $M_{EBiB}$  (= 195.05 g mol<sup>-1</sup>),  $M_{MBP}$  (= 167.00 g mol<sup>-1</sup>) and  $M_{BEB}$  (= 185.06 g mol<sup>-1</sup>) are the molecular weight of MA, MBP, EBiB and BEB, respectively. <sup>d</sup>Obtained from SEC measurements.

**Table S2.** Reaction conditions and results for the kinetics study of Ni-Co alloy mediated

| Entry | Time (min) | Conv. (%) | $M_{n,theo.}^b$ (g mol <sup>-1</sup> ) | $M_{n,SEC}^c$ (g mol <sup>-1</sup> ) | $\mathcal{D}^c$ |
|-------|------------|-----------|----------------------------------------|--------------------------------------|-----------------|
| P1    | 2          | 22        | 4000                                   | 3900                                 | 1.29            |
| P2    | 5          | 43        | 7600                                   | 8100                                 | 1.26            |
| P3    | 10         | 74        | 12900                                  | 12600                                | 1.24            |
| P4    | 15         | 87        | 15200                                  | 14800                                | 1.21            |
| P5    | 20         | 94        | 16400                                  | 16100                                | 1.18            |
| P6    | 30         | 100       | 17400                                  | 26900                                | 1.17            |

RDRP of MA in DMSO at 25 °C using EBiB as the initiator.<sup>a</sup>

<sup>a</sup>Reaction Conditions:  $[MA]_0/[EBiB]_0 = 200$ . <sup>b</sup> Determined gravimetrically based on monomer feed. <sup>c</sup>Calculated using yield as conversion and the following equation:  $M_{n,theo} = ([MA]_0/[EBiB]_0 \times \text{yield} \times M_{MA}) + M_{EBiB}$ , where  $M_{MA}$  (= 86.09 g mol<sup>-1</sup>) and  $M_{EBiB}$  (= 195.05 g

mol<sup>-1</sup>) are the molecular weight of MA and EBiB, respectively. <sup>d</sup>Obtained from SEC measurements.

## B. Supporting scheme

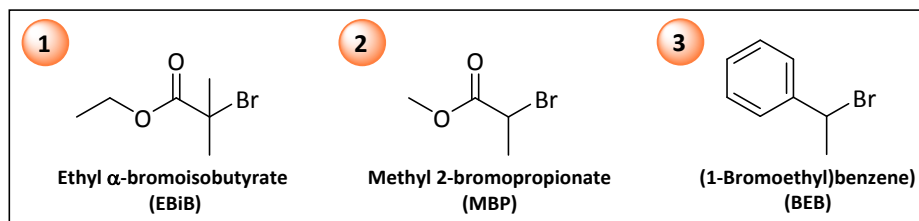

**Scheme S1** Chemical structures of the initiators employed in this study.

### C. Supporting figures

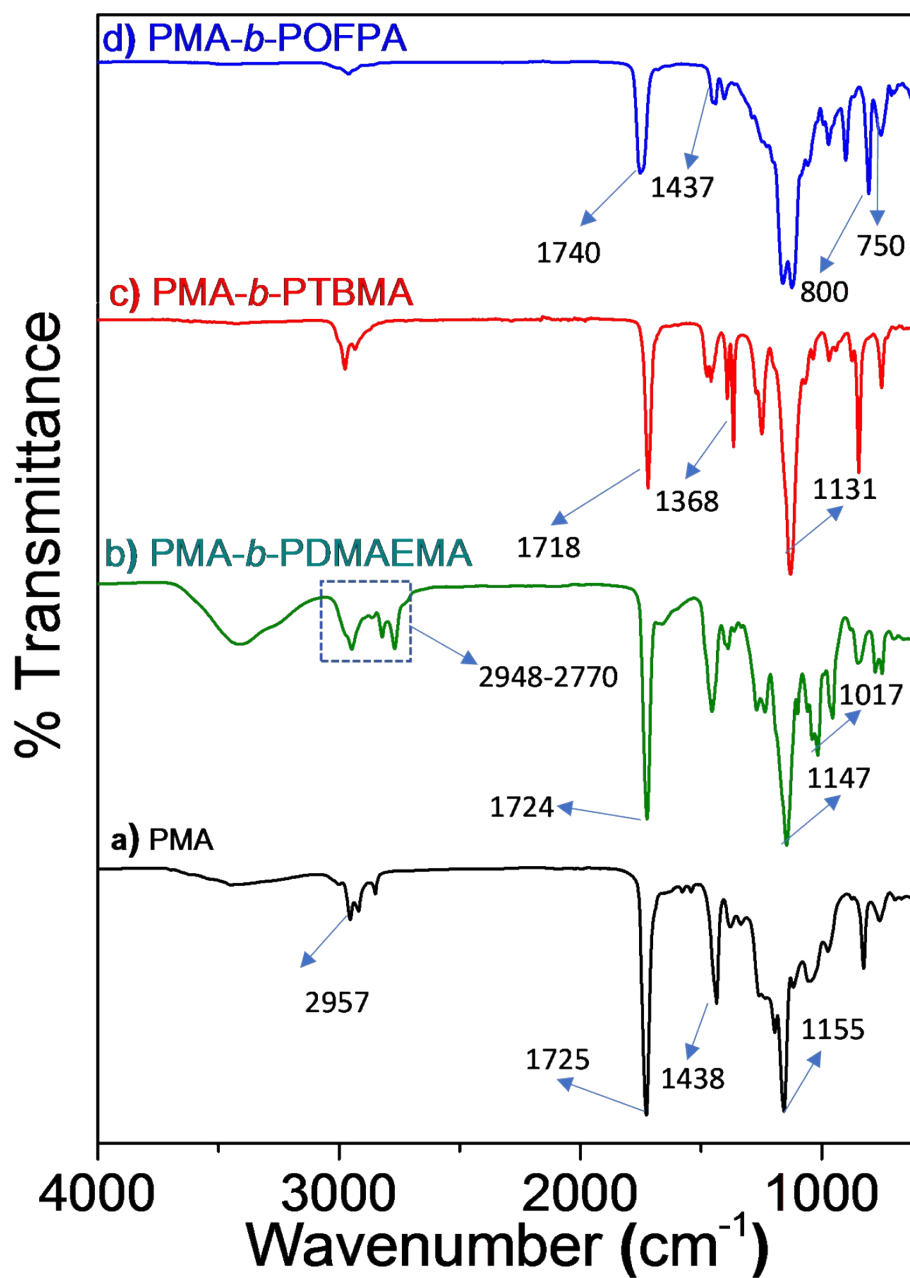

**Fig. S1** ATR-IR spectra of PMA-Br (P1, Table 1) (a), PMA-*b*-PDMAEMA (P9, Table 1) (b), PMA-*b*-PTBMA (P10, Table 1) (c) and PMA-*b*-POFPA (P11, Table 1) (d).

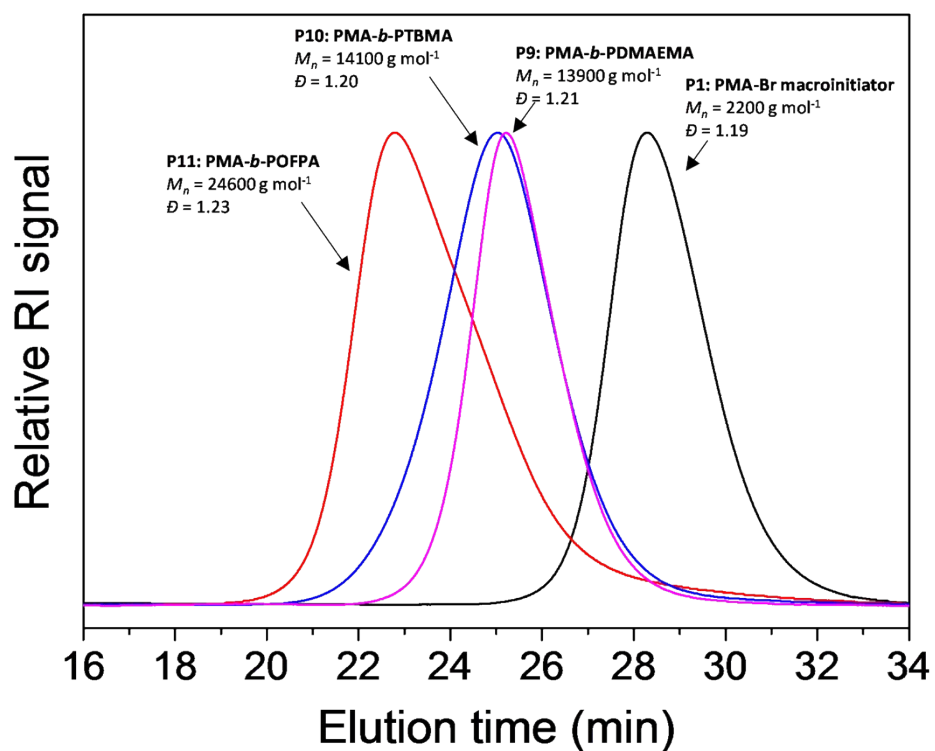

**Fig. S2** SEC traces of PMA-Br (P1, Table 1), PMA-*b*-PDMAEMA (P9, Table 1), PMA-*b*-PTBMA (P10, Table 1) and PMA-*b*-POFPA (P11, Table 1).

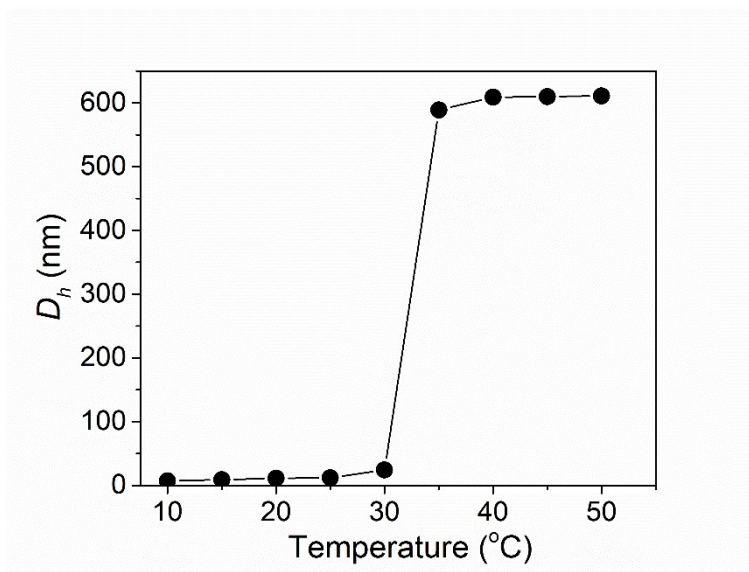

**Fig. S3** Plot of the hydrodynamic diameter ( $D_h$ ) as a function of temperature for an aqueous solution of PMA-*b*-PDMAEMA diblock copolymer at pH 10.5.

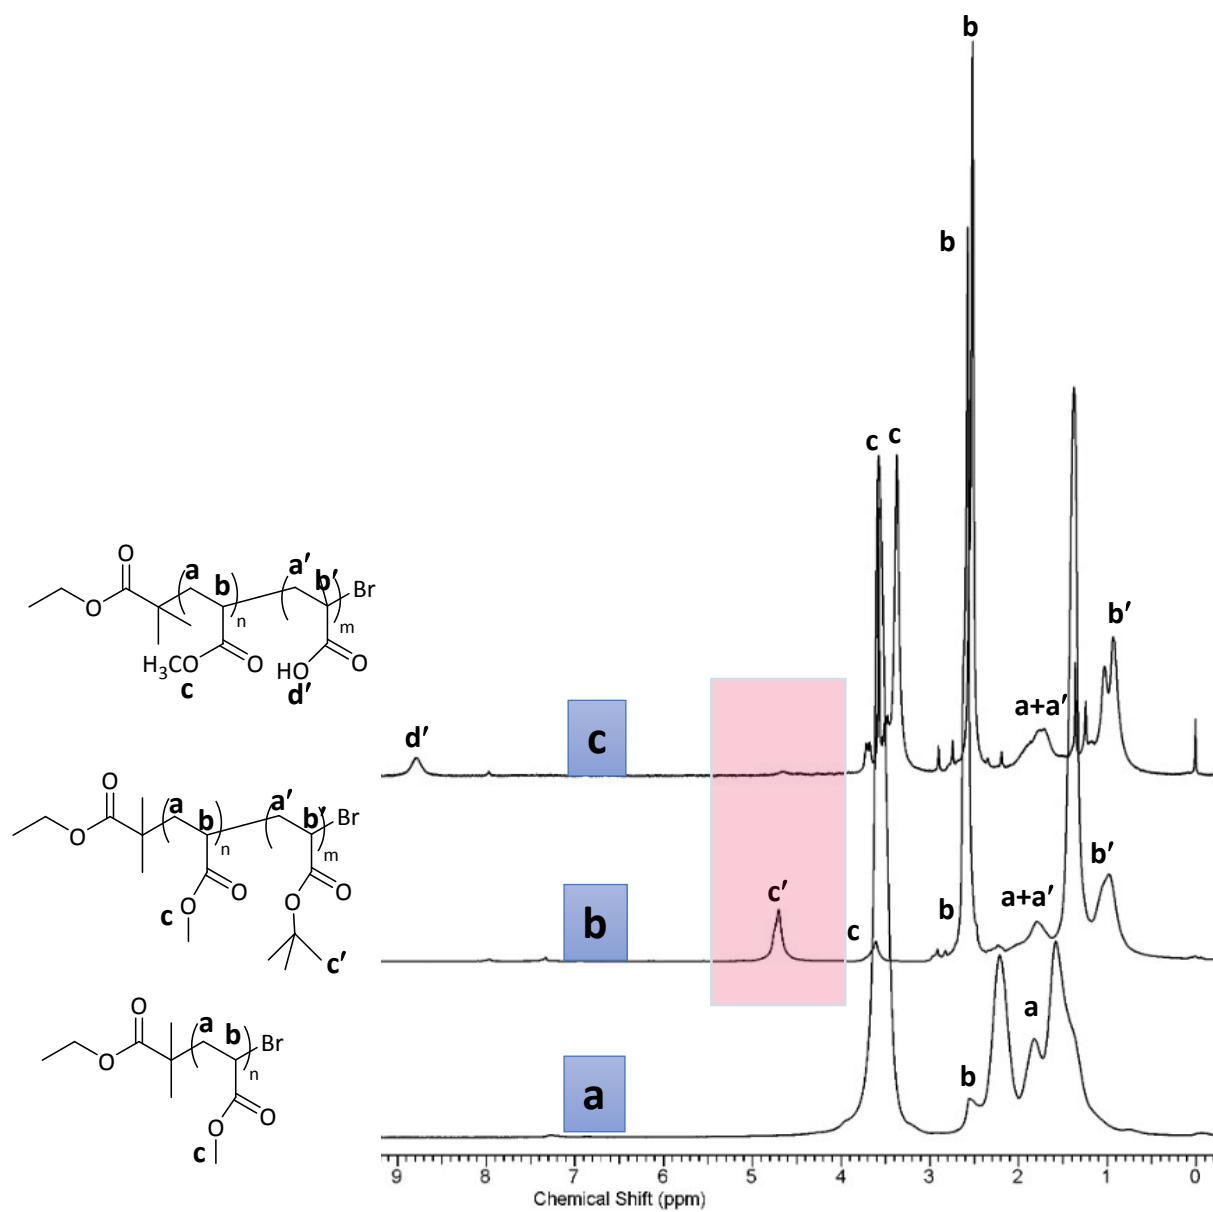

**Fig. S4**  $^1\text{H}$  NMR spectra of PMA-Br (P1, Table 1) (a); PMA-*b*-PTBMA (P10, Table 1) before (b) and after hydrolysis (c) of the *tert*-butyl ester groups.



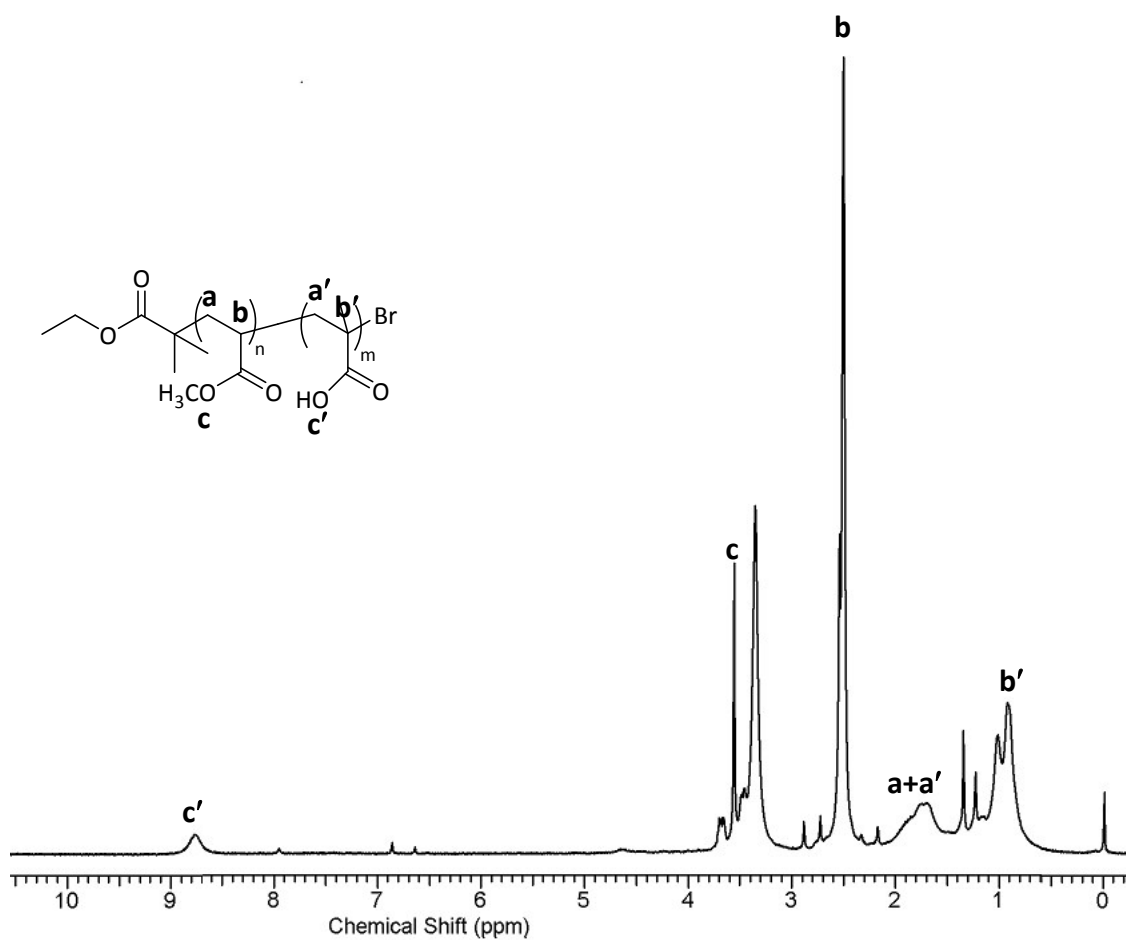

**Fig. S5** <sup>1</sup>H NMR spectrum of PMA-*b*-PMAA (P8, Table 1) obtained via hydrolysis of PMA-*b*-PTBMA.

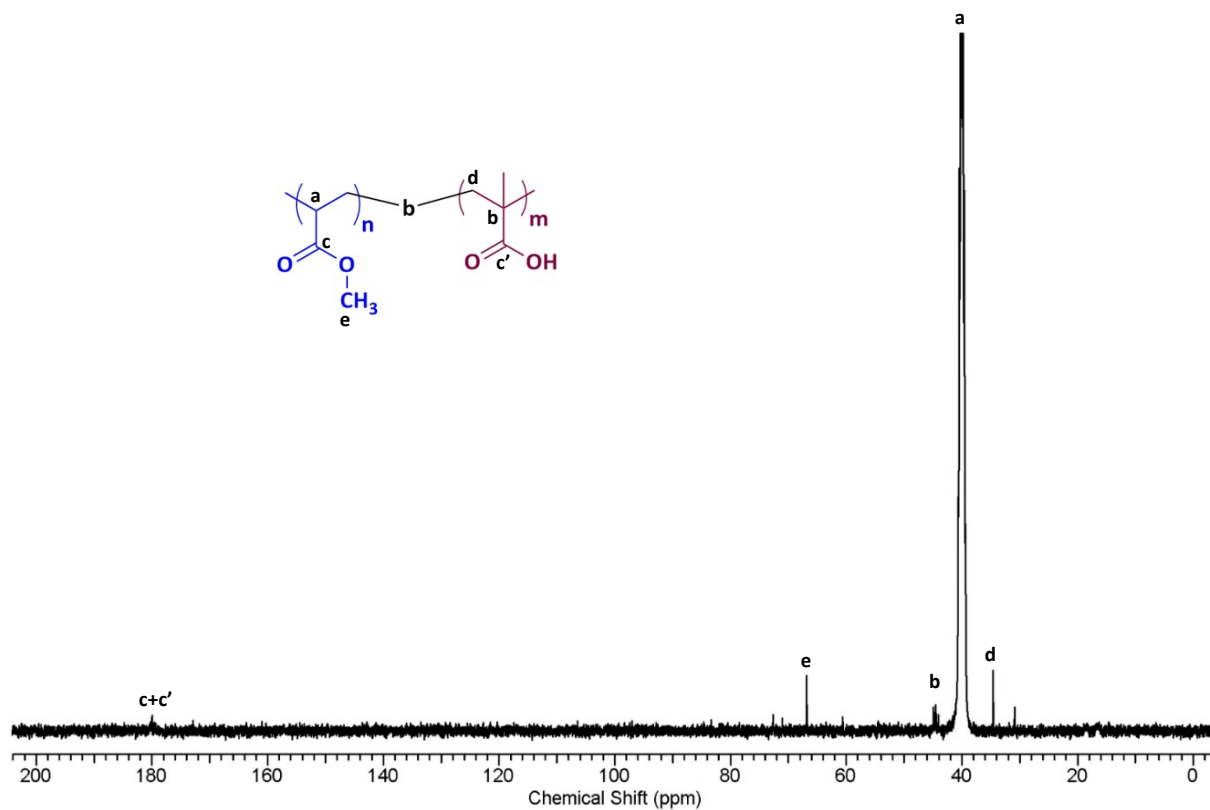

**Fig. S6**  $^{13}\text{C}$  NMR spectrum of PMA-*b*-PMAA (P8, Table 1) obtained via hydrolysis of PMA-*b*-PTBMA.
